# Supplementary material for: Organic geochemistry and mineralogy suggest anthropogenic impact in speleothem chemistry from volcanic show caves of the Galapagos
Source: PubMed Central journal article supplement (PMC9250005; doi:10.1016/j.isci.2022.104556), 2022-06-09
Supplement: mmc1.pdf [file mmc1.pdf]

**Supplemental information**

**Organic geochemistry and mineralogy suggest  
anthropogenic impact in speleothem chemistry  
from volcanic show caves of the Galapagos**

**Ana Z. Miller, Nicasio T. Jiménez-Morillo, Mathilda L. Coutinho, Fernando Gazquez, Vera Palma, Francesco Sauro, Manuel F.C. Pereira, Fernando Rull, Theofilos Toulkeridis, Ana T. Caldeira, Paolo Forti, and José M. Calaforra**

# *Organic geochemistry and mineralogy suggest anthropogenic impact in speleothem chemistry from volcanic show caves of the Galapagos*

Ana Z. Miller,<sup>1,2,10\*</sup> Nicasio T. Jiménez-Morillo,<sup>3</sup> Mathilda L. Coutinho,<sup>2</sup> Fernando Gazquez,<sup>4,5</sup> Vera Palma,<sup>2</sup> Francesco Sauro,<sup>6</sup> Manuel F.C. Pereira,<sup>7</sup> Fernando Rull,<sup>8</sup> Theofilos Toulkeridis,<sup>9</sup> Ana T. Caldeira,<sup>2</sup> Paolo Forti,<sup>6</sup> José M. Calaforra<sup>4,5</sup>

<sup>1</sup>Instituto de Recursos Naturales y Agrobiología de Sevilla (IRNAS-CSIC), Sevilla, Spain

<sup>2</sup>HERCULES Laboratory, University of Évora, Évora, Portugal

<sup>3</sup>MED—Mediterranean Institute for Agriculture, Environment and Development, Universidade de Évora, Portugal

<sup>4</sup>Department of Biology and Geology, Universidad de Almería, Spain

<sup>5</sup>Andalusian Centre for the Monitoring and Assessment of Global Change (CAESCG), University of Almería, Spain

<sup>6</sup>Department of Earth Sciences and Environmental Geology, University of Bologna, Bologna, Italy

<sup>7</sup>CERENA, Instituto Superior Técnico, Universidade de Lisboa, Portugal

<sup>8</sup>CSIC-CAB Associated Unit ERICA, Department of Condensed Matter Physics, Mineralogy and Crystallography, University of Valladolid, Boecillo, Spain

<sup>9</sup>Universidad de las Fuerzas Armadas (ESPE), Campus Sangolquí, Ecuador

<sup>10</sup>Lead contact

\*Correspondence: [anamiller@irnas.csic.es](mailto:anamiller@irnas.csic.es) / [anamiller@uevora.pt](mailto:anamiller@uevora.pt)

## Supplemental information

### Supplemental Figures

**A**

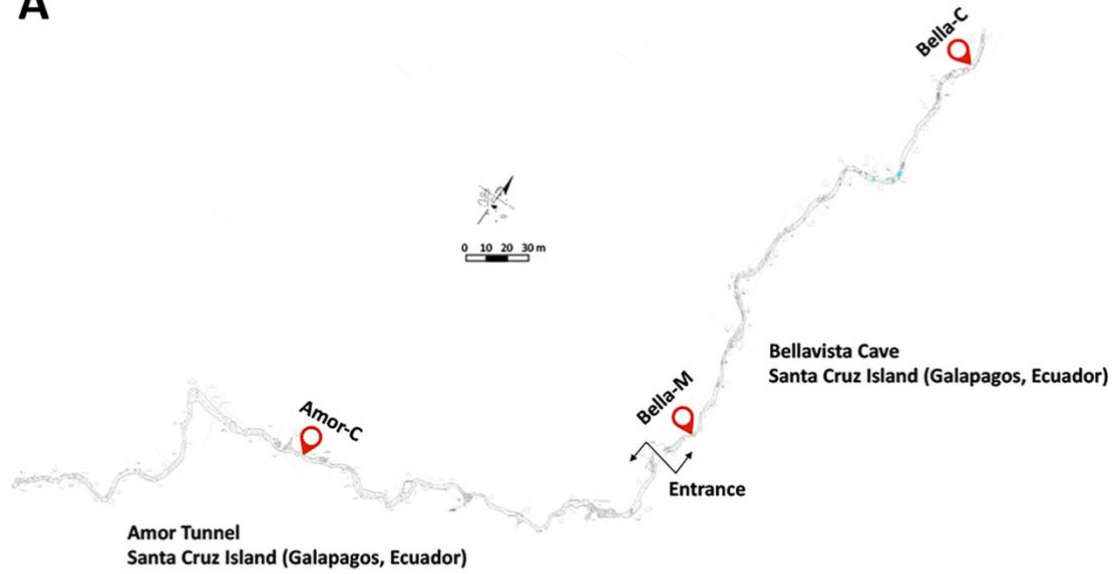

**B**

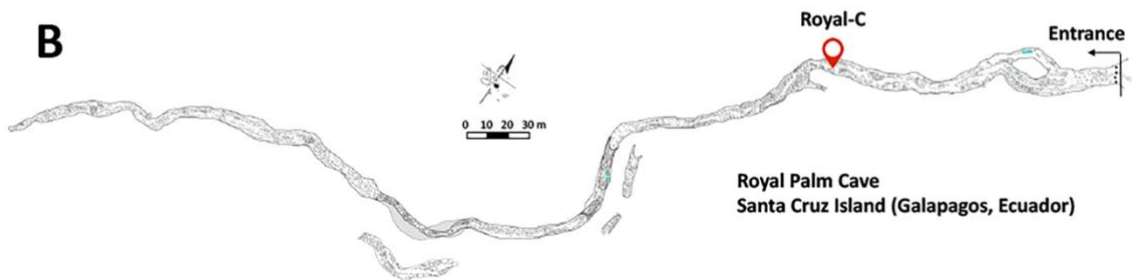

**Figure S1.** Topographical maps of the two lava tubes studied from Santa Cruz Island (Galapagos, Ecuador) with indication of the sampling points: (A) Bellavista Cave and Amor Tunnel section; (B) Royal Palm Cave. Related to STAR Methods.

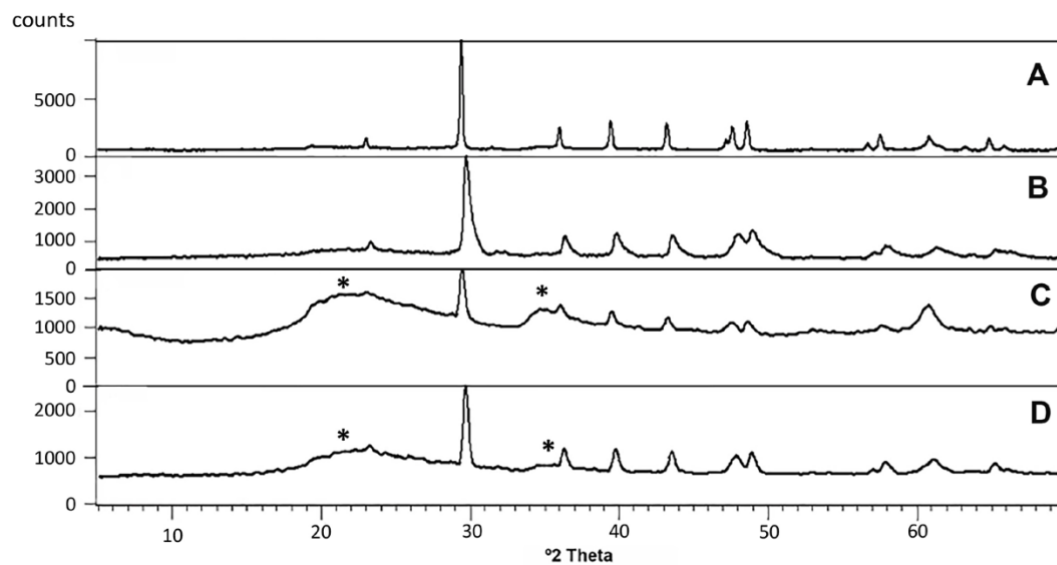

**Figure S2.** X-Ray diffraction patterns of the studied speleothems from lava tubes of Santa Cruz Island (Galapagos, Ecuador): (A) Bella-M (moonmilk); (B) Bella-C (coralloids); (C) Amor-C (coralloids); (D) Royal-C (coralloids); \* – amorphous compound. Related to Figures 1 – 4.

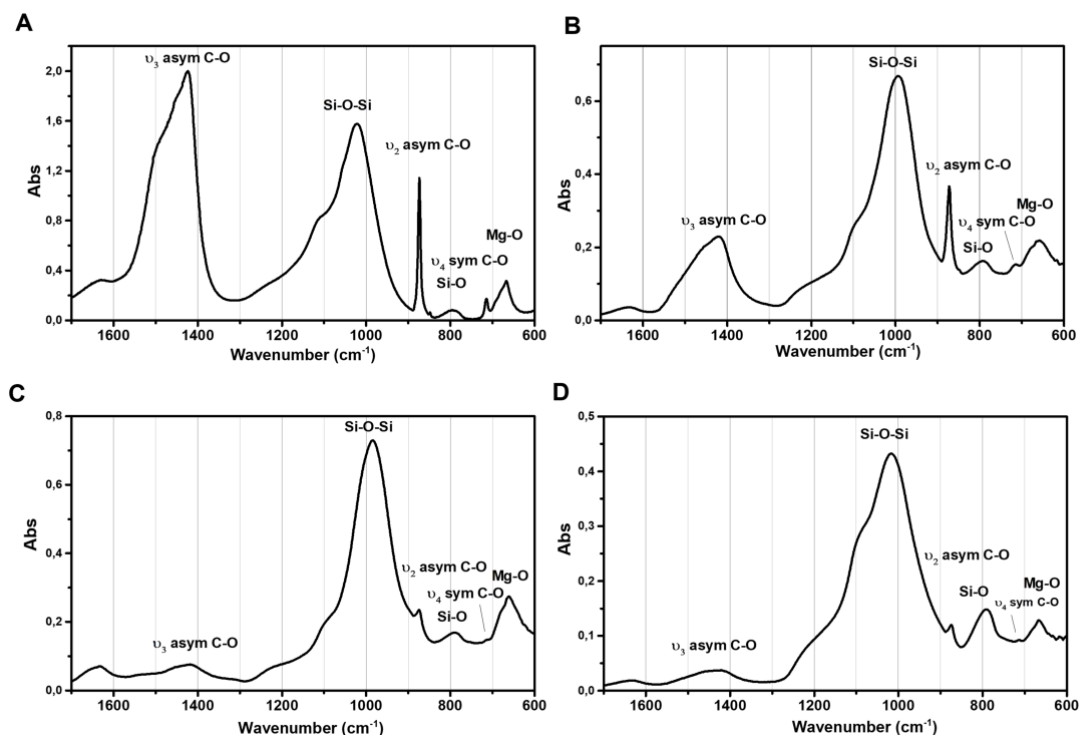

**Figure S3.** Infrared spectra of the studied speleothems from lava tubes of Santa Cruz Island (Galapagos, Ecuador): (A) Bella-M (moonmilk); (B) Bella-C (coralloids); (C) Amor-C (coralloids); (D) Royal-C (coralloids), showing the characteristic IR spectra of calcite, opal-A and magnesium oxide. Related to Figures 1 – 4.

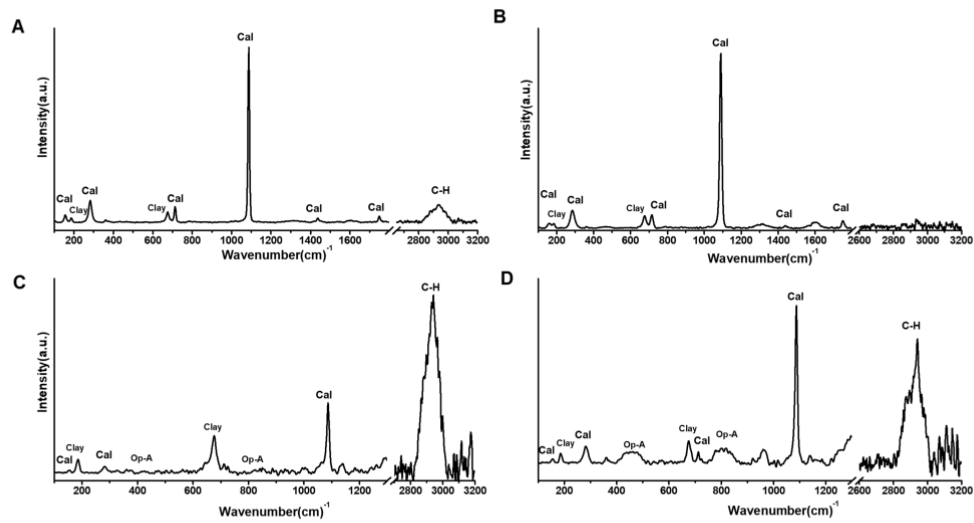

**Figure S4.** Raman spectra of the studied speleothems from lava tubes of Santa Cruz Island (Galapagos, Ecuador): (A) Bella-M (moonmilk); (B) Bella-C (coralloids); (C) Amor-C (coralloids); (D) Royal-C (coralloids). Cal = calcite; Clay = montmorillonite, Op-A = opal-A. Related to Figures 1 – 4.

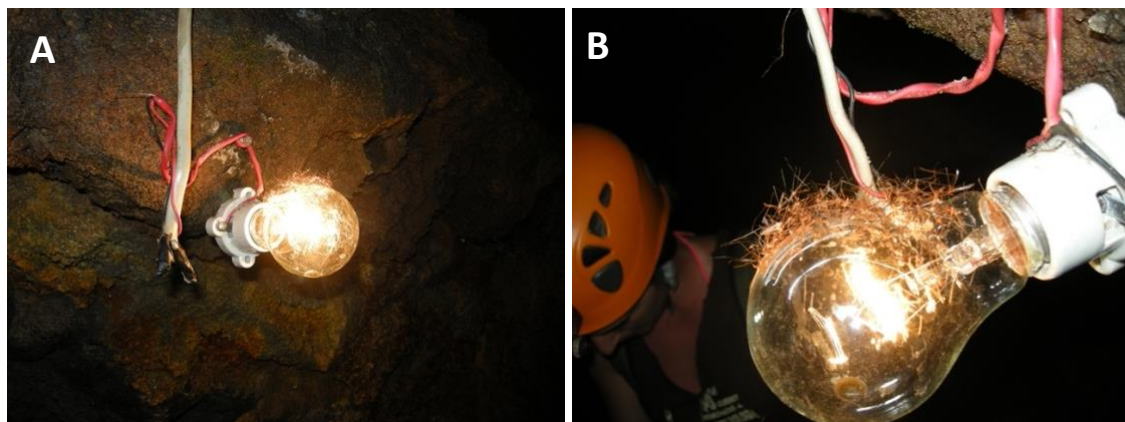

**Figure S5.** Royal Palm Cave lighting system. A) Electrical system installation; and B) Dead insects on the lamp. Related to Figure 6.

## Supplementary Tables

**Table S1.** Interpretation of band positions in FTIR and Raman spectrum of the speleothems. Related to Figures 1 – 4.

| IR (cm <sup>-1</sup> ) | Assignment                            | Possible mineral phase | Speleothem                         | Ref.                                 | Raman (cm <sup>-1</sup> ) | Assignment                | Possible mineral phase               | Speleothem                         | Ref.                                    |
|------------------------|---------------------------------------|------------------------|------------------------------------|--------------------------------------|---------------------------|---------------------------|--------------------------------------|------------------------------------|-----------------------------------------|
| 660-667                | Mg-O                                  | Sepiolite              | Bella-M, Bella- C, Amor-C, Royal-C | Miller et al. 2014                   | 154-157                   | Lattice mode calcite      | Calcite                              | Bella-M, Bella- C, Amor-C, Royal-C | Parker et al. 2010                      |
| 711-716                | O-C-O bending (in-plane deformation)  | Calcite                | Bella-M, Bella- C, Amor-C, Royal-C | Miller et al. 2018                   | 186-188                   | Lattice mode clay         | Clay mineral (montmorillonite)       | Bella-M, Bella- C, Amor-C, Royal-C | Wang et al. 2015                        |
| 791-797                | Si-O s-stretch                        | Opal A                 | Bella-M, Bella- C, Amor-C, Royal-C | Miller et al. 2014; Sodo et al. 2016 | 282-286                   | Lattice mode calcite      | Calcite                              | Bella-M, Bella- C, Amor-C, Royal-C | Parker et al. 2010                      |
| 870-875                | O-C-O bending (out-plane deformation) | Calcite                | Bella-M, Bella- C, Amor-C, Royal-C | Miller et al. 2018                   | 674-678                   | Si-O-Si vibrations        | Clay mineral (trioctahedral mineral) | Bella-M, Bella- C, Amor-C, Royal C | Wang et al. 2015                        |
| 983-1100               | Si-O a-stretch (SiO <sub>4</sub> )    | Opal A                 | Bella-M, Bella- C, Amor-C, Royal-C | Miller et al. 2014; Sodo et al. 2016 | 713-715                   | Sym. in-plane bending C-O | Calcite                              | Bella-M, Bella- C,                 | Parker et al. 2010                      |
| 1420-1430              | C-O a-stretch                         | Calcite                | Bella-M, Bella- C, Amor-C, Royal-C | Miller et al. 2018                   | 800                       | Si-O-Si vibrations        | Opal-A                               | Amor-C, Royal-C                    | Dovbeshko et al. 2004, Sodo et al. 2016 |
|                        |                                       |                        |                                    |                                      | 960                       | Silanol group (Si-OH)     | Opal-A                               | Amor-C, Royal-C                    | Sodo et al. 2016                        |
|                        |                                       |                        |                                    |                                      | 1086-1089                 | C-O s-stretch             | Calcite                              | Bella-M, Bella- C, Amor-C, Royal-C | Parker et al. 2010                      |
|                        |                                       |                        |                                    |                                      | 1318-1435                 | C-O a-stretch             | Calcite                              | Bella-M, Bella- C,                 | Parker et al. 2010                      |
|                        |                                       |                        |                                    |                                      | 1602-1748                 | C-O a-stretch             | Calcite                              | Bella-M, Bella- C,                 | Parker et al. 2010                      |
|                        |                                       |                        |                                    |                                      | 2934-2940                 | C-H vibrations            | Organic compounds                    | Bella-M, Amor6, Royal-C            | Howell et al. 1999                      |

**Table S2.** List of compounds identified by Py-GC/MS in speleothem samples. Related to Figure 6.

| Family                    | RT<br>(min)                                                       | Name of compound                   | Bella M<br>% | Bella C<br>% | Amor C<br>% | Royal C<br>% |
|---------------------------|-------------------------------------------------------------------|------------------------------------|--------------|--------------|-------------|--------------|
| <b>Alkyl hallogen</b>     | 8.6684                                                            | Alkyl hallogen                     | -            | -            | -           | +            |
|                           | 9.2939                                                            | Alkyl hallogen                     | -            | -            | -           | +            |
|                           | 10.0207                                                           | Alkyl hallogen                     | -            | -            | -           | +            |
|                           | 10.5678                                                           | Alkyl hallogen                     | -            | -            | -           | +            |
|                           | 10.9051                                                           | Alkyl hallogen                     | -            | -            | -           | +            |
| <b>Aromatic</b>           | 3.0540                                                            | Toluene                            | ++           | ++           | -           | -            |
|                           | 3.6307                                                            | <i>o</i> -Xylene                   | -            | ++           | -           | -            |
|                           | 3.6935                                                            | 1,2-Dihydrocatechol                | -            | -            | +           | -            |
|                           | 3.7782                                                            | Styrene                            | ++           | ++           | +           | -            |
|                           | 4.2587                                                            | Benzene, 1-ethyl-2methyl           | -            | -            | -           | ++           |
|                           | 4.4923                                                            | Benzene, 1,2,3-trimethyl           | +            | ++           | -           | +            |
|                           | 5.2083                                                            | Benzenamine, 2-methoxy-            | -            | -            | ++          | -            |
|                           | 5.4155                                                            | <i>o</i> -Cymene                   | +            | +            | -           | -            |
|                           | 5.5271                                                            | Benzene, 1,2,4,5-tetramethyl-      | ++           | ++           | -           | ++           |
|                           | 5.7315                                                            | Benzene, 1-methyl-2-(2-propenyl)   | -            | +            | -           | -            |
|                           | 5.8371                                                            | <i>p</i> -cymene                   | ++           | ++           | -           | ++           |
| 6.1950                    | 3,4-Dimethylcumene                                                | ++                                 | -            | -            | -           |              |
| 7.0036                    | Benzene, pentamethyl                                              | ++                                 | +            | -            | +           |              |
| <b>Condensed compound</b> | 6.1994                                                            | Naphthalene                        | -            | ++           | -           | -            |
|                           | 6.8773                                                            | Naphthalene, 1,2-dihydro-6-methyl- | -            | +            | -           | -            |
|                           | 7.2069                                                            | Naphthalene, 1-methyl-             | -            | +            | +           | +            |
|                           | 7.3765                                                            | Naphthalene, 2-methyl-             | +            | +            | -           | +            |
|                           | 8.3494                                                            | Naphthalene, 1,3-dimethyl-         | -            | ++           | -           | +            |
|                           | 9.2886                                                            | Naphthalene, 2,3,6-trimethyl       | -            | ++           | +           | -            |
|                           | 10.6747                                                           | Chamazulene                        | -            | +            | -           | -            |
| <b>Lipid</b>              | 2.0115                                                            | Propanal, 2-methyl                 | +            | +++          | ++          | -            |
|                           | 2.0189                                                            | 2-Pentene, 4-methyl                | -            | -            | -           | +            |
|                           | 2.3276                                                            | Acetic acid                        | -            | -            | ++          | -            |
|                           | 2.4434                                                            | Butanal, 3-methyl                  | ++           | +++          | +++         | -            |
|                           | 2.4457                                                            | Cyclopentene, 4-methyl-            | -            | -            | -           | ++           |
|                           | 2.5845                                                            | 2-Propanone, 1-hydroxyl            | -            | -            | +           | -            |
|                           | 2.6075                                                            | Cyclopentane, 1,2-dimethyl         | +            | -            | -           | -            |
|                           | 2.6855                                                            | 3-Hexyne, 2-methyl                 | -            | +++          | -           | +++          |
|                           | 2.9467                                                            | Cyclopropene, 3,3-diethyl          | ++           | +++          | -           | +++          |
|                           | 3.1727                                                            | 4-Octene                           | +            | ++           | -           | +++          |
|                           | 3.2849                                                            | Heptane, 2,4-dimethyl-             | -            | ++           | -           | -            |
|                           | 3.4630                                                            | Cyclopentane, butyl                | -            | -            | -           | +++          |
|                           | 3.7341                                                            | Cyclohexane, 1,2,3-trimethyl       | -            | -            | -           | +++          |
|                           | 3.8599                                                            | Cyclopentene, 1-(1-methylethyl)    | +            | -            | -           | -            |
|                           | 3.9994                                                            | 5-Decene-                          | -            | -            | -           | +            |
|                           | 4.1617                                                            | Nonane, 2-methyl                   | -            | -            | -           | +            |
|                           | 4.1619                                                            | Hexane, 3-ethyl-3-methyl           | -            | +            | -           | -            |
|                           | 4.2572                                                            | <i>trans</i> -3-Decene             | -            | -            | -           | ++           |
|                           | 4.2638                                                            | Heptane, 2,6-dimethyl-             | +            | -            | -           | -            |
|                           | 4.3737                                                            | 1-Decene                           | +            | -            | +           | -            |
|                           | 4.4049                                                            | Decane                             | -            | +            | -           | +            |
|                           | 4.5806                                                            | Decane, 4-methyl                   | +            | +            | -           | -            |
|                           | 4.5845                                                            | Octane, 3,3-dimethyl               | -            | -            | -           | +            |
|                           | 4.8709                                                            | Decane, 3,8-dimethyl-              | +++          | -            | -           | +++          |
|                           | 4.8533                                                            | <i>L</i> -Linalool                 | -            | -            | +           | -            |
|                           | 4.8711                                                            | Heptane, 2,5,5-trimethyl           | -            | +++          | -           | -            |
|                           | 5.0333                                                            | Borneol                            | -            | -            | ++          | -            |
|                           | 5.1369                                                            | 2-Dodecene                         | +            | ++           | -           | +++          |
|                           | 5.2221                                                            | Decane, 3,7-dimethyl-              | +            | -            | -           | -            |
|                           | 5.9848                                                            | 4-Dodecene                         | +            | -            | -           | -            |
|                           | 6.0467                                                            | Dodecane                           | -            | -            | +           | +++          |
|                           | 6.6338                                                            | Dodecane, 4,6-dimethyl-            | +++          | ++           | -           | ++           |
|                           | 6.7975                                                            | Dodecane, 2,6,11-trimethyl-        | +++          | +            | -           | -            |
| 6.8808                    | 1-Tridecene                                                       | -                                  | -            | +            | -           |              |
| 6.9460                    | Tridecane                                                         | -                                  | -            | +            | -           |              |
| 7.2927                    | Nonane, 3-methyl-5-propyl                                         | +                                  | -            | -            | -           |              |
| 7.4663                    | 3-Methyl-1-(tetrahydropyrrolo(1,2-c)oxazol-3-ylidene)-butan-2-one | -                                  | -            | +            | -           |              |
| 7.5285                    | Eicosene, 10-methyl                                               | -                                  | -            | -            | +           |              |
| 7.7856                    | 1-Tetradecene                                                     | -                                  | -            | +            | -           |              |
| 7.8576                    | Tetradecane                                                       | ++                                 | +            | +            | +           |              |
| 8.4295                    | Undecane, 4,7-dimethyl                                            | +++                                | -            | -            | -           |              |
| 8.5448                    | Pentadecane, 2,6,10-trimethyl                                     | +                                  | -            | -            | -           |              |
| 8.6720                    | Heptadecane, 2,6,10,15-tetramethyl                                | ++                                 | -            | -            | -           |              |

*Continued*

| <i>Family</i>            | <i>RT<br/>(min)</i>                                | <i>Name of compound</i>                                            | <i>%</i> | <i>%</i> | <i>%</i> | <i>%</i> |
|--------------------------|----------------------------------------------------|--------------------------------------------------------------------|----------|----------|----------|----------|
| <b>Lipid</b>             | 8.7531                                             | Pentadecane                                                        | +++      | +        | -        | +++      |
|                          | 9.1373                                             | Branched Alkane                                                    | ++       | +        | -        | -        |
|                          | 9.1349                                             | Branched Alkane                                                    | -        | -        | -        | +        |
|                          | 9.2991                                             | Branched Alkane                                                    | ++       | -        | -        | -        |
|                          | 9.6067                                             | Hexadecane                                                         | ++       | -        | ++       | +        |
|                          | 9.6892                                             | Branched Alkane                                                    | ++       | -        | -        | -        |
|                          | 9.9453                                             | Branched Alkane                                                    | ++       | -        | -        | -        |
|                          | 10.0253                                            | Branched Alkane                                                    | ++       | -        | +        | -        |
|                          | 10.1251                                            | Branched Alkane                                                    | +        | -        | -        | -        |
|                          | 10.2815                                            | Branched Alkane                                                    | ++       | -        | -        | -        |
|                          | 10.3596                                            | Branched Alkane                                                    | +        | -        | -        | -        |
|                          | 10.4322                                            | Heptadecane                                                        | +++      | -        | ++       | +        |
|                          | 10.5715                                            | Branched Alkane                                                    | +++      | -        | -        | -        |
|                          | 10.7400                                            | Branched Alkane                                                    | +        | -        | -        | -        |
|                          | 10.9084                                            | Branched Alkane                                                    | +++      | -        | -        | -        |
|                          | 11.0872                                            | Branched Alkane                                                    | +        | -        | -        | -        |
|                          | 11.2243                                            | Octadecane                                                         | ++       | -        | -        | -        |
|                          | 11.6447                                            | Branched Alkane                                                    | ++       | -        | ++       | +        |
|                          | 11.9512                                            | Branched Alkane                                                    | ++       | -        | -        | -        |
|                          | 12.1569                                            | Branched Alkane                                                    | +        | -        | -        | -        |
|                          | 12.2490                                            | Branched Alkane                                                    | ++       | -        | -        | -        |
|                          | 12.5068                                            | Branched Alkane                                                    | +        | -        | -        | -        |
|                          | 12.5868                                            | Nonadecene                                                         | +        | -        | +        | -        |
| <b>Nitrogen compound</b> | 2.1141                                             | Pentanenitrile                                                     | -        | -        | +        | -        |
|                          | 2.8169                                             | Butanenitrile, 3-methyl                                            | -        | -        | ++       | -        |
|                          | 2.8218                                             | 1-Allylazetidine                                                   | +        | -        | -        | -        |
|                          | 3.1028                                             | Acetamide                                                          | -        | -        | +++      | -        |
|                          | 3.4083                                             | 2-Cyanohe-3-ene                                                    | -        | -        | +++      | -        |
|                          | 4.6999                                             | Benzamine, <i>N</i> -ethyl                                         | -        | -        | +        | -        |
|                          | 5.3533                                             | 2-Pentenenitrile, 4,4-dimethyl                                     | -        | -        | +        | -        |
|                          | 5.6637                                             | Benzyl nitrile                                                     | +        | -        | +        | -        |
|                          | 6.3511                                             | Diisopropylaminoacetonitrile                                       | -        | -        | +        | -        |
|                          | 6.5697                                             | Benzenepropanenitrile                                              | -        | -        | +        | -        |
|                          | 7.3669                                             | Cyclohexanamine, <i>N</i> -cyclohexyl- <i>N</i> -methyl            | -        | -        | +        | -        |
|                          | 8.4045                                             | <i>N</i> -(3-Amino-2-hydroxy-phenyl)-acetamide                     | -        | -        | ++       | -        |
| 12.0544                  | Hexadecanenitrile                                  | -                                                                  | -        | +        | -        |          |
| <b>Peptide</b>           | 2.9442                                             | 1H-Pyrrole                                                         | -        | -        | ++       | -        |
|                          | 3.4065                                             | 1,3-Diazine                                                        | ++       | -        | -        | -        |
|                          | 3.4184                                             | 1H-Pyrrole, 3-methyl                                               | -        | +++      | -        | -        |
|                          | 3.5894                                             | Pyridine, 4-methyl-                                                | -        | -        | +        | -        |
|                          | 3.9308                                             | 1H-Pyrrole, 1-ethyl                                                | -        | ++       | ++       | -        |
|                          | 4.0099                                             | Pyridine, 2,5-dimethyl                                             | +        | -        | -        | -        |
|                          | 4.0676                                             | 3-Cyclohexene-1-carboxaldehyde, 1-methyl-                          | +        | -        | -        | -        |
|                          | 4.1248                                             | 3-Pyridinol, 2-nitro                                               | +        | -        | -        | -        |
|                          | 4.1281                                             | 2-Pyridinecarboxylic acid, 6-methyl                                | -        | -        | +        | -        |
|                          | 4.5692                                             | 1H-Pyrrole, 2,3,5-trimethyl-                                       | -        | -        | ++       | -        |
|                          | 5.4210                                             | 2,5-Pyrrolidinedione                                               | -        | -        | +        | -        |
|                          | 5.5001                                             | 1H-Pyrrole, 3-ethyl-2,4,5-trimethyl-                               | -        | -        | +        | -        |
|                          | 5.7318                                             | 1H-Indene, 2,3-dihydro-4-methyl                                    | -        | -        | -        | +        |
|                          | 5.8382                                             | 1H-Indene, 3-methyl                                                | -        | -        | +        | -        |
|                          | 6.2127                                             | 5- <i>sec</i> -Butyluracil                                         | -        | -        | +        | -        |
|                          | 6.7823                                             | 5-Hydroxy-indan-2-one                                              | -        | -        | +        | -        |
|                          | 7.1082                                             | Indole                                                             | -        | -        | +        | -        |
|                          | 7.6272                                             | Quinoline, 4-methyl                                                | -        | -        | +        | -        |
|                          | 7.9615                                             | Tryptamine                                                         | -        | +        | -        | -        |
|                          | 7.9726                                             | 1H-Indole, 7-methyl-                                               | +        | -        | ++       | -        |
|                          | 8.0549                                             | Diketopyperazine                                                   | -        | +        | -        | -        |
|                          | 8.5019                                             | 2-(Methoxycarbonyl)-2-methyl-3-( <i>N</i> -pyrrolidino)(2H)azirine | -        | -        | +        | -        |
|                          | 8.6886                                             | Pyridine, 4-phenyl-                                                | -        | -        | ++       | -        |
| 8.8508                   | 1H-Indole, 1,2-dimethyl                            | -                                                                  | -        | +        | -        |          |
| 9.6159                   | Diketopyperazine                                   | -                                                                  | +        | -        | -        |          |
| 10.0278                  | Diketopyperazine                                   | -                                                                  | +        | -        | -        |          |
| 10.8699                  | <i>N</i> -(Dimethylthiophosphinyl)-3-aminopyridine | -                                                                  | -        | +        | -        |          |
| <b>Polysaccharide</b>    | 2.2024                                             | Furan, 2-methyl-                                                   | ++       | +++      | +        | +++      |
|                          | 2.6882                                             | Furan, 2,5-dimethyl-                                               | +        | -        | +        | -        |
|                          | 3.2520                                             | Furfural                                                           | -        | -        | ++       | -        |
|                          | 4.2768                                             | 2-Cyclopenten-1-one, 3-methyl                                      | -        | -        | ++       | -        |

\* + = Low relative abundance; ++ = medium relative abundance; +++ = high relative abundance; and - = null
